# Supplementary material
Source: HighWire-hosted journal article supplement (https://bmjopen.bmj.com/content/7/3/e014579)
Supplement: inline-supplementary-material-3 [file inline-supplementary-material-3.pdf]

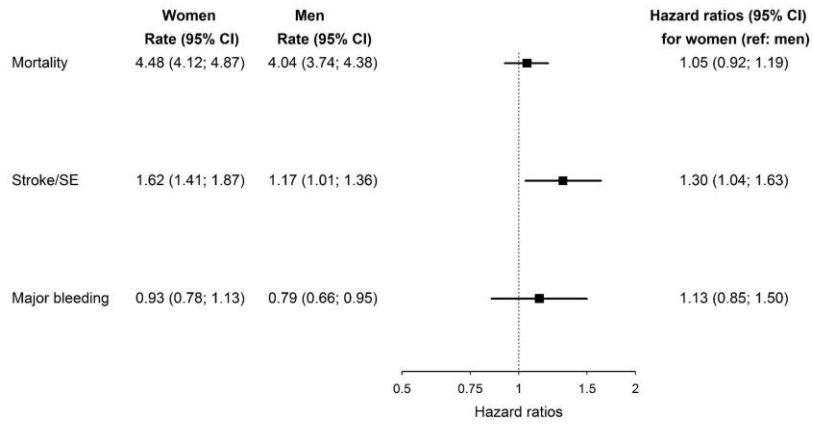

Supplementary Figure 1. One year event rates (per 100 person-years) and adjusted hazard ratios according to gender.
